# Supplementary material for: Proteomic Analysis of Bifidobacterium longum subsp. infantis Reveals the Metabolic Insight on Consumption of Prebiotics and Host Glycans
Source: PubMed Central journal article supplement (PMC3582569; doi:10.1371/journal.pone.0057535), 2013-02-26

**Supplementary Figure S1** Cell growth profile of *B. infantis* ATCC 15697 grown on different carbon sources. (A) *B. infantis* was cultivated in the microplate reader with 15mL of DMZ media and 2% (w/v) of carbon sources. Optical density (OD) was measured automatically at 600 nm without dilution. Carbon sources and their symbol were noted in the onset. LAC; lactose, GLC; glucose, FOS; fructooligosaccharide, INL; inulin, HMO; human milk oligosaccharide, GOS; galactooligosaccharide (B) *B. infantis* was cultivated in 25mL of M17 media with 2% (w/v) of glucose, mucin and HMO as a carbon source. Optical density of cell was measured with appropriate dilution within the range of 0.3~0.5 at the wavelength of 600 nm.

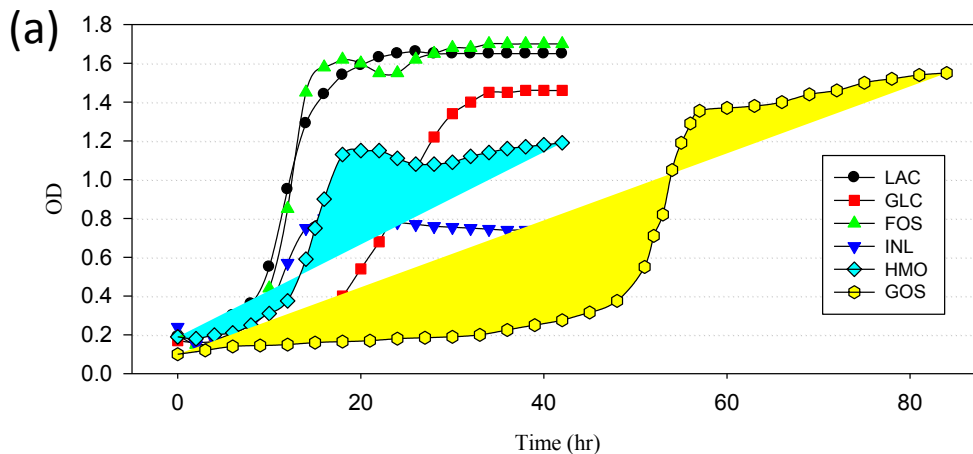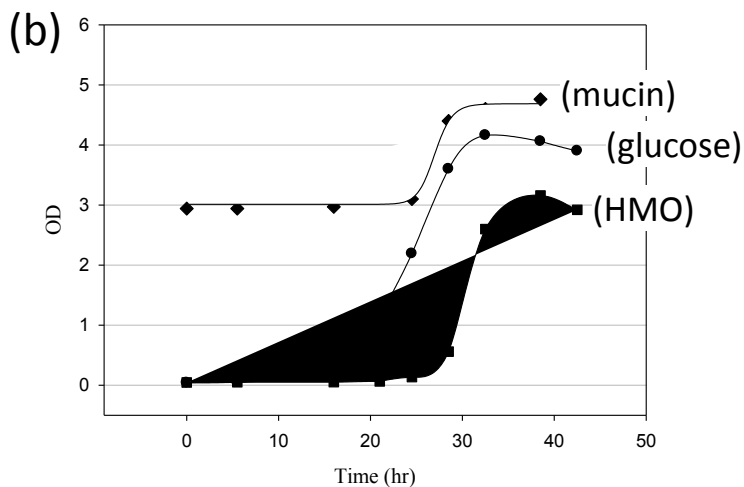

Supplement: pone.0057535.s001.pdf [file pone.0057535.s001.pdf]
