# Supplementary material for: Proteomic Analysis of Bifidobacterium longum subsp. infantis Reveals the Metabolic Insight on Consumption of Prebiotics and Host Glycans
Source: PubMed Central journal article supplement (PMC3582569; doi:10.1371/journal.pone.0057535), 2013-02-26

**Supplementary Figure S2** Hierarchical cluster analysis of protein expression profile grown on different carbon sources. Similarity was calculated by Euclidian distance and the cluster was built by the Average linkage method. LAC; lactose, GLC; glucose, FOS; fructooligosaccharide, INL; inulin, HMO; human milk oligosaccharide, GOS; galactooligosaccharide

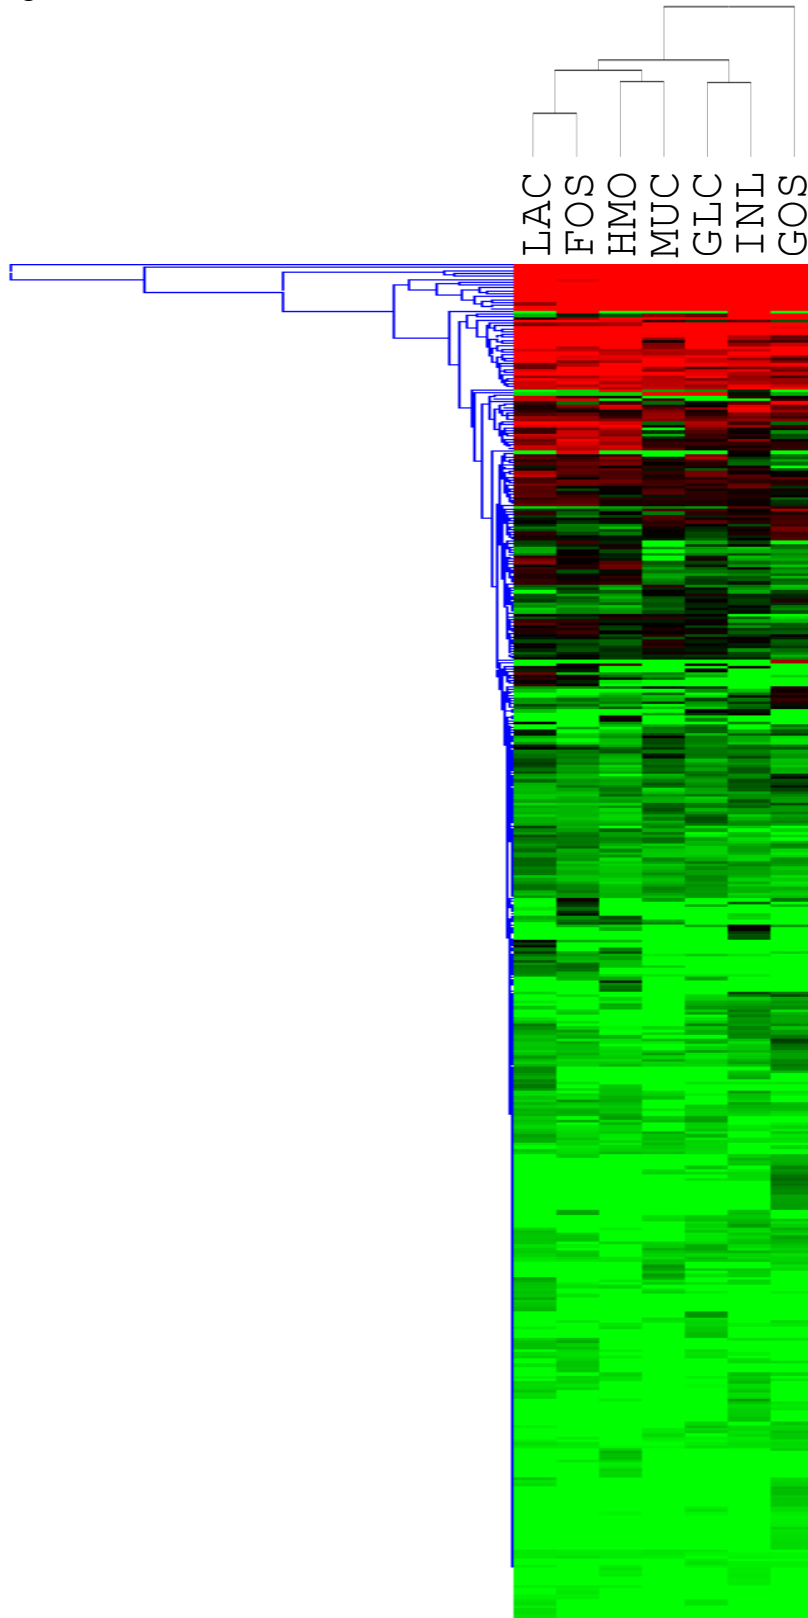

Supplement: pone.0057535.s002.pdf [file pone.0057535.s002.pdf]
