# Supplementary material for: Proteomic Analysis of Bifidobacterium longum subsp. infantis Reveals the Metabolic Insight on Consumption of Prebiotics and Host Glycans
Source: PubMed Central journal article supplement (PMC3582569; doi:10.1371/journal.pone.0057535), 2013-02-26

**Supplementary Figure S4** Expression of (a) family 3 and (b) family 5 extracellular solute binding (ESB) proteins. Gray and block bar represent the NSAF values obtained from the proteome of CWA and cytosolic fraction, respectively. LAC; lactose, GLC; glucose, FOS; fructooligosaccharide, INL; inulin, HMO; human milk oligosaccharide, GOS; galactooligosaccharide

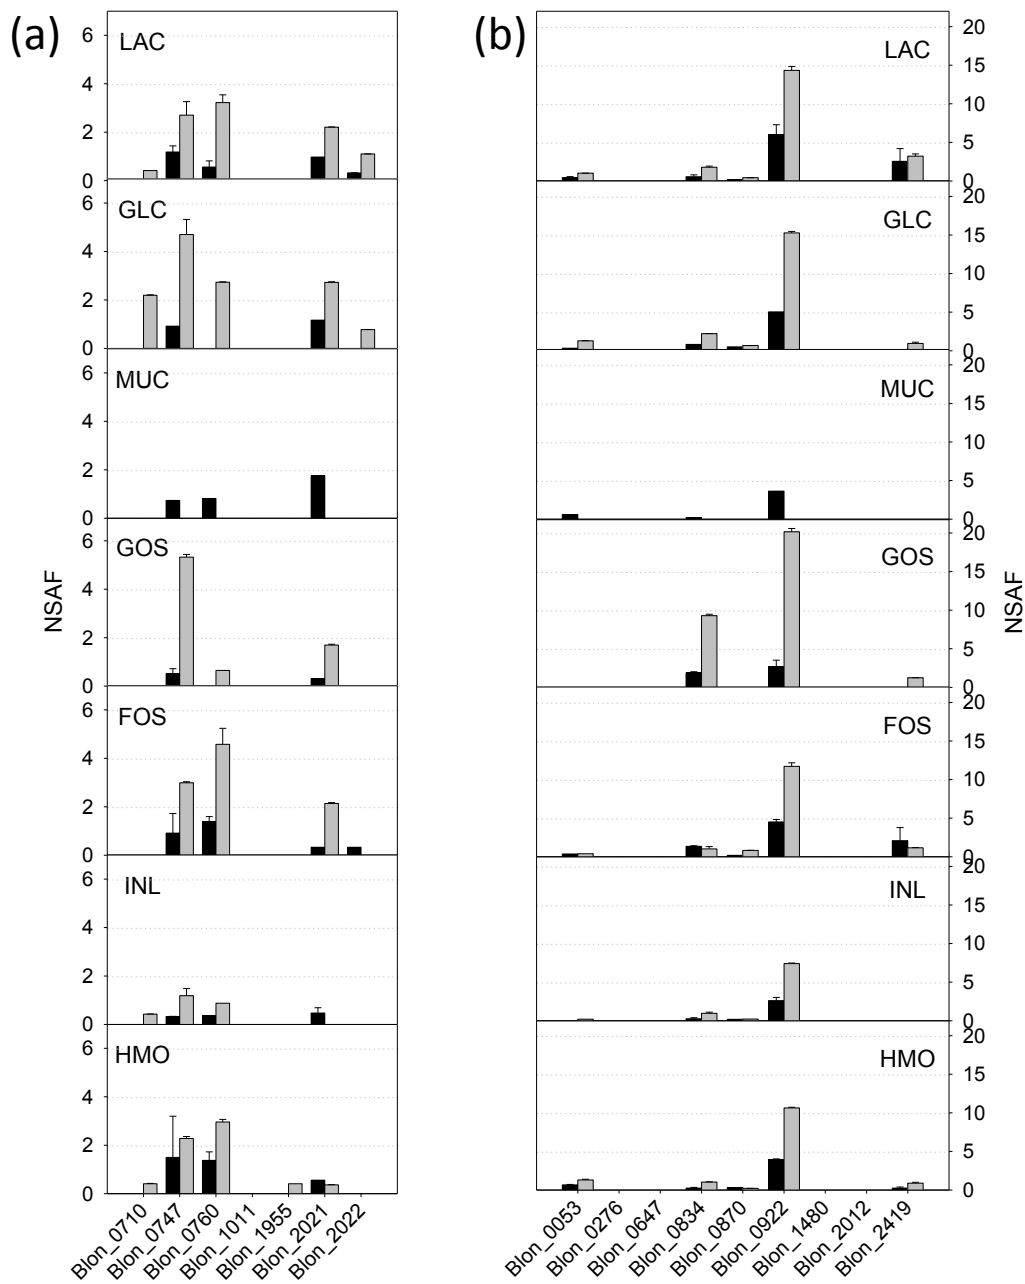

Supplement: pone.0057535.s004.pdf [file pone.0057535.s004.pdf]
