# Supplementary material for: Proteomic Analysis of Bifidobacterium longum subsp. infantis Reveals the Metabolic Insight on Consumption of Prebiotics and Host Glycans
Source: PubMed Central journal article supplement (PMC3582569; doi:10.1371/journal.pone.0057535), 2013-02-26
Supplement: pone.0057535.s006.pdf [file pone.0057535.s006.pdf]

**Table S1:** The score system to determine the protein localization.

| Condition                                                                                             | Point |
|-------------------------------------------------------------------------------------------------------|-------|
| ID(CW) <sup>a</sup> or $\Psi(\text{NSAF}_{\text{insol}} \text{NSAF}_{\text{sol}})^{\text{b}} \geq +3$ | +1    |
| ID(WCL) <sup>a</sup> or $\Psi(\text{NSAF}_{\text{insol}} \text{NSAF}_{\text{sol}}) \leq -3$           | -1    |
| $+2 < \Psi(\text{NSAF}_{\text{insol}} \text{NSAF}_{\text{sol}}) < +3$                                 | +0.5  |
| $-3 < \Psi(\text{NSAF}_{\text{insol}} \text{NSAF}_{\text{sol}}) < -2$                                 | -0.5  |
| $-2 < \Psi(\text{NSAF}_{\text{insol}} \text{NSAF}_{\text{sol}}) < +2$                                 | 0     |

<sup>a</sup>ID(CW), ID(WCL): Identified only at cell wall (CW) or whole cell lysate (WCL) fraction, respectively

<sup>b</sup>The NSAF ratio of a protein between CW and WCL fraction. If the NSAF at CW fraction was higher than the WCL fraction, the ratio had a positive value. Conversely, the ratio had a negative value. It can be calculated as follows.

$$\Psi(\text{NSAF}_{\text{insol}}|\text{NSAF}_{\text{sol}}) = \begin{cases} \frac{\text{NSAF}_{\text{insol}}}{\text{NSAF}_{\text{sol}}}, & \text{if } \text{NSAF}_{\text{insol}} \geq \text{NSAF}_{\text{sol}} \\ -\frac{\text{NSAF}_{\text{insol}}}{\text{NSAF}_{\text{sol}}}, & \text{if } \text{NSAF}_{\text{insol}} < \text{NSAF}_{\text{sol}} \end{cases}$$

where  $\text{NSAF}_{\text{insol}}$  and  $\text{NSAF}_{\text{sol}}$  were the NSAF values at insoluble and soluble fraction, respectively.
