# Supplementary material for: Proteomic Analysis of Bifidobacterium longum subsp. infantis Reveals the Metabolic Insight on Consumption of Prebiotics and Host Glycans
Source: PubMed Central journal article supplement (PMC3582569; doi:10.1371/journal.pone.0057535), 2013-02-26
Supplement: pone.0057535.s007.pdf [file pone.0057535.s007.pdf]

**Table S2:** The range of a score that determine the protein location.

| Ave(point) <sup>a</sup> | Location                    |
|-------------------------|-----------------------------|
| +0.5 ~ + 1.0            | Cell wall association (CWA) |
| -0.5 ~ -1.0             | Cytosol (CYT)               |
| -0.5 ~ +0.5             | Unidentified (UI)           |

<sup>a</sup> The average scores of a protein as determined by the rule in Supplementary Table S1.
