# Supplementary material for: Proteomic Analysis of Bifidobacterium longum subsp. infantis Reveals the Metabolic Insight on Consumption of Prebiotics and Host Glycans
Source: PubMed Central journal article supplement (PMC3582569; doi:10.1371/journal.pone.0057535), 2013-02-26
Supplement: pone.0057535.s008.pdf [file pone.0057535.s008.pdf]

**Table S3:** Number of proteins expressed in the *B. infantis* proteome across different prebiotics.

| Location                   | Carbohydrate |         |     |     |        |     | Total |
|----------------------------|--------------|---------|-----|-----|--------|-----|-------|
|                            | Glucose      | Lactose | GOS | FOS | Inulin | HMO |       |
| Cytosolic (CYT)            | 140          | 109     | 166 | 104 | 128    | 139 | 196   |
| Cell wall associated (CWA) | 85           | 86      | 119 | 143 | 77     | 53  | 93    |
| Unidentified (UI)          | 165          | 172     | 109 | 100 | 169    | 159 | 251   |
| Total                      | 390          | 367     | 394 | 347 | 374    | 351 | 540   |
