# Supplementary material for: Proteomic Analysis of Bifidobacterium longum subsp. infantis Reveals the Metabolic Insight on Consumption of Prebiotics and Host Glycans
Source: PubMed Central journal article supplement (PMC3582569; doi:10.1371/journal.pone.0057535), 2013-02-26
Supplement: pone.0057535.s009.pdf [file pone.0057535.s009.pdf]

**Table S4:** Linear correlation coefficients (Pearson's Product) between two proteomes.

|     | LAC   | FOS   | HMO   | MUC   | GLC   | INL   |
|-----|-------|-------|-------|-------|-------|-------|
| FOS | 0.963 |       |       |       |       |       |
| HMO | 0.927 | 0.913 |       |       |       |       |
| MUC | 0.888 | 0.875 | 0.927 |       |       |       |
| GLC | 0.859 | 0.842 | 0.849 | 0.903 |       |       |
| INL | 0.824 | 0.856 | 0.792 | 0.855 | 0.906 |       |
| GOS | 0.628 | 0.631 | 0.604 | 0.691 | 0.881 | 0.828 |
