# Supplementary material for: Proteomic Analysis of Bifidobacterium longum subsp. infantis Reveals the Metabolic Insight on Consumption of Prebiotics and Host Glycans
Source: PubMed Central journal article supplement (PMC3582569; doi:10.1371/journal.pone.0057535), 2013-02-26
Supplement: pone.0057535.s010.pdf [file pone.0057535.s010.pdf]

**Table S5** Normalized protein amounts of representative cell surface associated proteins in soluble and insoluble fraction.

| Blon | Name                             | Soluble fraction (NSAFX10 <sup>3</sup> ) |           |           |           |           |           | Insoluble fraction (NSAFX10 <sup>3</sup> ) |           |            |            |            |           | Ratio <sup>a</sup> (Fold) |         |       |       |        |       |
|------|----------------------------------|------------------------------------------|-----------|-----------|-----------|-----------|-----------|--------------------------------------------|-----------|------------|------------|------------|-----------|---------------------------|---------|-------|-------|--------|-------|
|      |                                  | Lactose                                  | Glucose   | GOS       | FOS       | Inulin    | HMO       | Lactose                                    | Glucose   | GOS        | FOS        | Inulin     | HMO       | Lactose                   | Glucose | GOS   | FOS   | Inulin | HMO   |
| 1259 | Allergen V5/Tpx-1 family protein |                                          |           |           |           |           |           | 9.04±0.10                                  | 9.19±0.07 | 19.05±0.54 | 14.16±0.38 | 7.62±0.17  | 8.18±0.20 | Insol                     | Insol   | Insol | Insol | Insol  | Insol |
| 2082 | lipopolysaccharide biosynthesis  | 0.53±0.45                                |           | 0.42±0.00 | 0.23±0.01 | 0.21±0.00 |           | 2.33±0.18                                  | 2.60±0.02 | 3.95±0.35  | 3.32±0.05  | 1.89±0.20  | 2.05±0.10 | 4.40                      | Insol   | 9.40  | 14.43 | 9.00   | Insol |
| 2183 | Glucose PTS system, IIA subunit  |                                          | 1.98±0.32 |           |           | 2.62±1.52 |           | 0.33±0.00                                  | 6.78±0.18 |            |            | 16.03±0.42 | 2.45±0.38 | Insol                     | 3.42    |       |       | 6.12   | Insol |
| 305  | ATP synthase F0, B subunit       | 0.59±0.00                                | 1.00±0.17 | 2.78±1.49 |           | 0.58±0.00 | 0.59±0.00 | 5.39±0.02                                  | 4.99±0.04 | 6.71±0.87  |            | 2.07±0.02  | 2.63±0.84 | 9.14                      | 4.99    | 2.41  |       | 3.57   | 4.46  |
| 1721 | NLPA lipoprotein                 | 3.77±0.29                                | 2.68±0.43 | 0.67±0.53 | 3.50±0.68 | 0.80±0.23 | 2.12±0.22 | 6.78±0.03                                  | 8.76±0.07 | 6.06±0.54  | 4.37±0.07  | 3.86±0.04  | 7.39±0.26 | 1.80                      | 3.27    | 9.04  | 1.25  | 4.83   | 3.49  |
| 2067 | Glycosyl transferase, family 51  |                                          |           | 0.20±0.08 |           |           |           | 0.30±0.00                                  |           | 3.49±0.07  |            |            |           | Insol                     |         | 17.45 |       |        |       |

<sup>a</sup> NSAF ratio between insoluble and soluble fraction (See Supplementary Table S1). ‘Insol’ indicates that the protein was identified only at the insoluble fraction.
