# Supplementary material for: Proteomic Analysis of Bifidobacterium longum subsp. infantis Reveals the Metabolic Insight on Consumption of Prebiotics and Host Glycans
Source: PubMed Central journal article supplement (PMC3582569; doi:10.1371/journal.pone.0057535), 2013-02-26
Supplement: pone.0057535.s011.pdf [file pone.0057535.s011.pdf]

**Table S6** List of top 30 most expressed proteins in (a) soluble and (b) insoluble fractions. The rank was determined by the sum of all NSAF values of each carbon sources. The CWA proteins were marked by gray area. Ribosomal proteins were excluded in the list. LAC; lactose, GLC; glucose, GOS; galactooligosaccharides, FOS; fructooligosaccharides, INL; inulin, HMO; human milk oligosaccharides, MUC; mucin.

| Rank | Blon | Name                                                   | LAC   | GLC   | GOS   | FOS   | INL   | HMO   | MUC   |
|------|------|--------------------------------------------------------|-------|-------|-------|-------|-------|-------|-------|
| 1    | 1922 | translation elongation factor Tu                       | 33.75 | 25.97 | 33.78 | 46.37 | 32.68 | 38.86 | 30.88 |
| 2    | 694  | chaperonin GroEL                                       | 24.44 | 21.21 | 29.80 | 31.93 | 28.01 | 28.47 | 32.57 |
| 3    | 679  | histone family protein DNA-binding protein             | 13.55 | 59.56 | 30.48 | 15.00 | 39.03 | 13.04 | 21.44 |
| 4    | 840  | L-lactate dehydrogenase                                | 8.22  | 25.55 | 31.58 | 7.37  | 15.09 | 21.95 | 44.43 |
| 5    | 1095 | transcriptional regulator, Fis family                  | 16.49 | 28.02 | 35.28 | 13.63 | 24.97 | 15.32 | 15.61 |
| 6    | 1836 | Phosphopyruvate hydratase                              | 23.98 | 20.19 | 15.32 | 28.03 | 14.83 | 20.35 | 17.60 |
| 7    | 1696 | O-acetylhomoserine/O-acetylserine sulphydrylase        | 8.18  | 11.95 | 38.73 | 9.62  | 21.80 | 10.12 | 14.34 |
| 8    | 1722 | Fructose-6-phosphate phosphoketolase                   | 17.93 | 14.46 | 12.42 | 17.16 | 16.71 | 17.29 | 15.08 |
| 9    | 1455 | homocysteine S-methyltransferase                       | 10.68 | 14.83 | 17.26 | 9.41  | 25.79 | 8.55  | 19.66 |
| 10   | 1096 | transketolase                                          | 15.78 | 13.46 | 18.01 | 13.62 | 14.50 | 12.52 | 11.29 |
| 11   | 900  | glyceraldehyde-3-phosphate dehydrogenase, type I       | 11.15 | 15.12 | 10.64 | 13.17 | 20.28 | 13.41 | 14.38 |
| 12   | 540  | lactaldehyde reductase                                 | 3.03  | 9.11  | 15.85 | 5.74  | 21.86 | 8.50  | 8.35  |
| 13   | 2152 | phosphoglycerate mutase 1 family                       | 10.28 | 9.33  | 15.91 | 10.26 | 9.61  | 8.41  | 8.51  |
| 14   | 1007 | pyridoxamine 5'-phosphate oxidase-related, FMN-binding | 8.65  | 10.98 | 13.31 | 8.41  | 11.40 | 9.55  | 10.70 |
| 15   | 2216 | adenylate kinase                                       | 5.14  | 12.84 | 10.64 | 5.69  | 10.06 | 6.10  | 13.62 |
| 16   | 1745 | Pyruvate kinase                                        | 8.75  | 6.50  | 14.44 | 8.42  | 9.54  | 6.75  | 6.19  |
| 17   | 1087 | Phosphoglycerate kinase                                | 10.04 | 9.38  | 6.17  | 7.30  | 7.49  | 7.66  | 7.41  |
| 18   | 1754 | RNA binding S1 domain protein                          | 4.92  | 8.04  | 8.48  | 6.32  | 7.51  | 9.27  | 8.97  |
| 19   | 2191 | ribose 5-phosphate isomerase                           | 11.07 | 7.12  | 5.63  | 5.29  | 7.21  | 6.04  | 10.44 |
| 20   | 676  | conserved hypothetical protein                         | 10.18 | 8.95  | 11.71 | 6.28  | 7.90  | 9.15  | 5.37  |
| 21   | 309  | ATP synthase F1, beta subunit                          | 6.99  | 6.37  | 12.91 | 6.75  | 6.53  | 6.21  | 6.52  |
| 22   | 1731 | acetate kinase                                         | 6.79  | 6.50  | 8.51  | 7.66  | 8.18  | 6.30  | 7.00  |
| 23   | 1940 | succinocarboxamide synthase                            | 9.47  | 6.98  | 4.38  | 7.68  | 5.71  | 7.38  | 9.26  |
| 24   | 1893 | glutamine synthetase, type I                           | 12.58 | 1.92  | 1.75  | 15.00 | 4.53  | 7.60  | 3.69  |
| 25   | 1057 | translation elongation factor Ts                       | 7.15  | 5.83  | 7.54  | 6.21  | 7.82  | 7.60  | 6.61  |
| 26   | 417  | Glucose-6-phosphate isomerase                          | 8.15  | 5.04  | 6.47  | 7.41  | 5.84  | 7.74  | 6.44  |
| 27   | 1923 | translation elongation factor G                        | 6.91  | 7.01  | 6.24  | 7.90  | 6.33  | 6.32  | 6.54  |
| 28   | 141  | chaperone protein DnaK                                 | 4.78  | 3.92  | 5.92  | 8.80  | 5.07  | 8.36  | 6.10  |
| 29   | 1905 | Beta-glucosidase                                       | 0.72  | 4.77  | 13.25 | 2.13  | 13.51 | 1.62  | 5.47  |
| 30   | 2211 | DNA-directed RNA polymerase, alpha subunit             | 5.51  | 5.00  | 5.85  | 5.54  | 5.66  | 5.40  | 5.33  |

  

| Blon | Name                                                      | LAC   | GLC   | GOS   | FOS   | INL   | HMO   |
|------|-----------------------------------------------------------|-------|-------|-------|-------|-------|-------|
| 1922 | translation elongation factor Tu                          | 52.38 | 59.71 | 52.68 | 48.01 | 56.49 | 57.04 |
| 1836 | Phosphopyruvate hydratase                                 | 32.07 | 30.10 | 23.44 | 28.30 | 34.51 | 32.30 |
| 694  | chaperonin GroEL                                          | 33.10 | 22.32 | 15.75 | 33.37 | 23.15 | 23.76 |
| 840  | L-lactate dehydrogenase                                   | 20.30 | 26.65 | 22.20 | 10.52 | 12.63 | 33.86 |
| 1095 | transcriptional regulator, Fis family                     | 19.58 | 17.88 | 21.53 | 19.25 | 21.20 | 15.98 |
| 1096 | transketolase                                             | 18.81 | 21.65 | 10.87 | 18.68 | 22.82 | 19.77 |
| 679  | histone family protein DNA-binding protein                | 11.90 | 5.30  | 45.10 | 26.67 | 10.27 | 9.86  |
| 1722 | Fructose-6-phosphate phosphoketolase                      | 16.71 | 15.08 | 13.56 | 11.68 | 14.53 | 15.03 |
| 2152 | phosphoglycerate mutase 1 family                          | 16.49 | 11.47 | 18.05 | 10.94 | 15.21 | 11.35 |
| 922  | ESB protein, family 5                                     | 14.33 | 15.27 | 20.16 | 11.71 | 7.39  | 10.64 |
| 540  | lactaldehyde reductase                                    | 6.21  | 10.89 | 14.16 | 6.44  | 22.65 | 11.46 |
| 1259 | Allergen V5/Tpx-1 family protein                          | 9.04  | 9.19  | 19.05 | 14.16 | 7.62  | 8.18  |
| 1745 | Pyruvate kinase                                           | 8.33  | 10.34 | 14.42 | 7.47  | 9.89  | 9.47  |
| 2061 | ESB protein, family 1                                     |       |       |       | 15.51 | 43.71 | 0.43  |
| 1696 | O-acetylhomoserine/O-acetylserine sulphydrylase           | 5.69  | 7.98  | 12.98 | 10.76 | 12.34 | 5.33  |
| 1923 | translation elongation factor G                           | 8.60  | 10.40 | 9.79  | 8.40  | 6.88  | 10.12 |
| 2216 | adenylate kinase                                          | 9.35  | 13.19 | 5.73  | 7.84  | 7.66  | 9.51  |
| 1455 | homocysteine S-methyltransferase                          | 6.04  | 6.87  | 8.79  | 9.79  | 9.21  | 7.57  |
| 1715 | formate acetyltransferase                                 | 4.40  | 9.93  | 7.85  | 4.47  | 10.87 | 10.29 |
| 676  | conserved hypothetical protein                            | 9.68  | 9.39  | 13.60 | 4.68  | 9.92  |       |
| 900  | glyceraldehyde-3-phosphate dehydrogenase, type I          | 6.91  | 10.44 | 6.80  | 6.04  | 9.95  | 5.66  |
| 1905 | Beta-glucosidase                                          | 1.51  | 3.48  | 11.75 | 4.24  | 20.21 | 2.27  |
| 1893 | glutamine synthetase, type I                              | 7.76  | 2.95  | 3.16  | 15.71 | 7.82  | 5.95  |
| 1940 | succinocarboxamide synthase                               | 6.49  | 8.83  | 6.03  | 7.18  | 5.47  | 8.68  |
| 1731 | acetate kinase                                            | 7.51  | 8.09  | 6.95  | 4.93  | 9.58  | 5.43  |
| 2475 | ABC transporter related                                   | 1.86  | 3.11  | 7.34  | 11.66 | 10.77 | 7.59  |
| 417  | Glucose-6-phosphate isomerase                             | 6.77  | 5.54  | 6.76  | 7.94  | 7.99  | 5.14  |
| 1164 | Phosphoribosylaminoimidazolecarboxamide formyltransferase | 6.38  | 9.24  | 4.46  | 5.63  | 7.00  | 6.49  |
| 309  | ATP synthase F1, beta subunit                             | 4.73  | 6.51  | 9.97  | 5.04  | 6.42  | 4.88  |
| 1721 | NLPA lipoprotein                                          | 6.78  | 8.76  | 6.06  | 4.37  | 3.86  | 7.39  |
